# Supplementary material
Source: publisher site journal article supplement (https://www.dovepress.com/article/370477)
Supplement: Supplementary file 1 [file get_supplementary_file.php]

Supplementary Table 1. Comparison of statistically significant GLCM parameters in T2WI sequences of stage I EC patients

| **Variables** | **Overall(N=48)** | **IA(N=26)** | **IB(N=22)** | **P-value** |
| --- | --- | --- | --- | --- |
| Age (median [IQR]),year | 56.00 [44.00, 64.25] | 54.50 [43.00, 64.00] | 57.50 [47.00, 64.75] | 0.597 |
| BMI (median [IQR]) ,kg/m2 | 24.05 [22.48, 27.00] | 24.45 [22.68, 26.80] | 23.50 [21.95, 26.88] | 0.709 |
| Smoking (%) |  |  |  |  |
| Yes | 20 (41.7) | 9 (34.6) | 11 (50.0) | 0.433 |
| No | 28 (58.3) | 17 (65.4) | 11 (50.0) |  |
| Drinking (%) |  |  |  |  |
| Yes | 19 (39.6) | 11 (42.3) | 8 (36.4) | 0.902 |
| No | 29 (60.4) | 15 (57.7) | 14 (63.6) |  |
| Hypertension (%) |  |  |  |  |
| Yes | 26 (54.2) | 15 (57.7) | 11 (50.0) | 0.809 |
| No | 22 (45.8) | 11 (42.3) | 11 (50.0) |  |
| Diabetes (%) |  |  |  |  |
| Yes | 27 (56.2) | 18 (69.2) | 9 (40.9) | 0.093 |
| No | 21 (43.8) | 8 (30.8) | 13 (59.1) |  |
| Menopause (%) |  |  |  |  |
| Yes | 26 (54.2) | 14 (53.8) | 12 (54.5) | 1 |
| No | 22 (45.8) | 12 (46.2) | 10 (45.5) |  |
| CA199 (median [IQR]),U/mL | 43.45 [35.30, 51.97] | 41.30 [33.88, 49.55] | 46.95 [39.85, 57.13] | 0.049 |
| CA125 (median [IQR]) ,U/mL | 59.75 [48.90, 69.12] | 62.05 [53.00, 68.32] | 56.05 [44.10, 78.73] | 0.598 |
| Pathological type (%) |  |  |  |  |
| Adenocarcinoma | 40 (83.3) | 24 (92.3) | 16 (72.7) | 0.154 |
| Non-adenocarcinoma | 8 (16.7) | 2 (7.7) | 6 (27.3) |  |
| Correlation_AllDirection_offset1 (median [IQR]) | 2.43 [2.20, 2.88] | 2.21 [1.60, 2.41] | 3.00 [2.68, 3.30] | <0.001 |
| Correlation_angle0_offset1 (median [IQR]) | 2.65 [1.94, 3.39] | 1.96 [1.63, 2.32] | 3.42 [3.12, 4.16] | <0.001 |
| Correlation_angle45_offset1 (median [IQR]) | 2.22 [1.79, 2.70] | 1.83 [1.56, 2.05] | 2.78 [2.61, 3.35] | <0.001 |
| Correlation_angle90_offset1 (median [IQR]) | 2.73 [2.12, 3.19] | 2.13 [1.91, 2.54] | 3.29 [2.90, 3.82] | <0.001 |
| Inertia_AllDirection_offset1 (median [IQR]) | 183.00 [154.75, 198.75] | 195.00 [175.00, 217.75] | 165.00 [112.00, 189.00] | 0.004 |
| Inertia_AllDirection_offset1_SD (median [IQR]) | 3385.50 [2243.50, 5715.50] | 5592.00 [3675.00, 6481.50] | 2142.00 [1112.50, 2807.50] | <0.001 |
| Inertia_angle0_offset1 (median [IQR]) | 132.50 [100.50, 173.50] | 170.00 [139.25, 196.00] | 95.50 [79.00, 121.75] | <0.001 |
| Inertia_angle45_offset1 (median [IQR]) | 204.50 [165.25, 264.75] | 260.50 [226.00, 300.25] | 155.50 [119.25, 183.75] | <0.001 |
| Inertia_angle90_offset1 (median [IQR]) | 127.50 [111.50, 137.50] | 136.50 [114.75, 157.75] | 122.50 [103.75, 130.75] | 0.014 |
| IDMoment_AllDirection_offset1 (median [IQR]) | 0.10 [0.09, 0.12] | 0.10 [0.09, 0.10] | 0.12 [0.11, 0.13] | <0.001 |
| IDMoment_angle0_offset1 (median [IQR]) | 0.11 [0.10, 0.13] | 0.10 [0.09, 0.11] | 0.13 [0.12, 0.14] | <0.001 |
| IDMoment_angle45_offset1 (median [IQR]) | 0.10 [0.08, 0.11] | 0.08 [0.07, 0.10] | 0.12 [0.10, 0.12] | <0.001 |
| IDMoment_angle90_offset1 (median [IQR]) | 0.12 [0.10, 0.14] | 0.10 [0.09, 0.13] | 0.14 [0.12, 0.15] | <0.001 |

Abbreviations: IQR. inter-quartile range;BMI. body mass index;CA199. Carbohydrate antigen199;CA125. Carbohydrate antigen125; FIGO. Federation International of Gynecology and Obstetrics.

Supplementary Table2. The candidate variables screening associated with myometrial invasion via RFC algorithm.

| **Variables** | **Mean decrease accuracy** | **Mean decrease Gini** |
| --- | --- | --- |
| Age | -2.12E-36 | 2.72E-15 |
| BMI | 1.35E-20 | 2.90E-15 |
| Smoking | -7.29E-36 | 1.97E-15 |
| Drinking | -3.80E-21 | 1.54E-15 |
| Hypertension | -1.58E-35 | 1.97E-15 |
| Diabetes | -1.000500375 | 1.44E-15 |
| Menopause | 1.03E-35 | 2.09E-15 |
| CA199 | 2.607051029 | 0.149763 |
| CA125 | 1.821008199 | 0.054299 |
| Pathological_type | -9.53E-35 | 2.65E-16 |
| Correlation_AllDirection_offset1 | 14.0993031 | 7.014105 |
| Correlation_angle0_offset1 | 14.4009118 | 7.103186 |
| Correlation_angle45_offset1 | 14.91200754 | 7.443233 |
| Correlation_angle90_offset1 | 14.10455623 | 6.630188 |
| Inertia_AllDirection_offset1 | 3.169099919 | 0.115747 |
| Inertia_AllDirection_offset1_SD | 1.99E-20 | 4.32E-15 |
| Inertia_angle0_offset1 | 4.219050882 | 0.15116 |
| Inertia_angle45_offset1 | 2.991688211 | 0.087349 |
| Inertia_angle90_offset1 | -6.30E-21 | 0.000997 |
| IDMoment_AllDirection_offset1 | 14.484649 | 7.087813 |
| IDMoment_angle0_offset1 | 9.216893373 | 3.057787 |
| IDMoment_angle45_offset1 | 5.959492622 | 1.092489 |
| IDMoment_angle90_offset1 | 6.608292667 | 1.488421 |

Supplementary Table 3. Prediction node and weight were allocated via ANN algorithm.

| **Steps** | **Weight** |
| --- | --- |
| Intercept.to.1layhid1 | -1.34E+01 |
| Correlation_AllDirection_offset1.to.1layhid1 | 2.17E+00 |
| Correlation_angle0_offset1.to.1layhid1 | 2.71E+00 |
| Correlation_angle45_offset1.to.1layhid1 | 4.36E+00 |
| Correlation_angle90_offset1.to.1layhid1 | 4.36E-01 |
| IDMoment_AllDirection_offset1.to.1layhid1 | 5.70E-01 |
| IDMoment_angle0_offset1.to.1layhid1 | 1.74E+00 |
| IDMoment_angle45_offset1.to.1layhid1 | 9.35E-01 |
| Intercept.to.1layhid2 | 3.10E-01 |
| Correlation_AllDirection_offset1.to.1layhid2 | 7.15E-01 |
| Correlation_angle0_offset1.to.1layhid2 | -5.20E-01 |
| Correlation_angle45_offset1.to.1layhid2 | 1.71E-01 |
| Correlation_angle90_offset1.to.1layhid2 | -8.94E-01 |
| IDMoment_AllDirection_offset1.to.1layhid2 | -1.80E+00 |
| IDMoment_angle0_offset1.to.1layhid2 | 1.49E-01 |
| IDMoment_angle45_offset1.to.1layhid2 | 6.03E-01 |
| Intercept.to.1layhid3 | -1.95E+00 |
| Correlation_AllDirection_offset1.to.1layhid3 | 1.16E+00 |
| Correlation_angle0_offset1.to.1layhid3 | 6.50E-01 |
| Correlation_angle45_offset1.to.1layhid3 | 1.30E+00 |
| Correlation_angle90_offset1.to.1layhid3 | -5.56E-01 |
| IDMoment_AllDirection_offset1.to.1layhid3 | -9.58E-01 |
| IDMoment_angle0_offset1.to.1layhid3 | -4.05E-01 |
| IDMoment_angle45_offset1.to.1layhid3 | 1.57E-01 |
| Intercept.to.1layhid4 | -1.75E+00 |
| Correlation_AllDirection_offset1.to.1layhid4 | 1.59E+00 |
| Correlation_angle0_offset1.to.1layhid4 | 3.43E-01 |
| Correlation_angle45_offset1.to.1layhid4 | 1.13E+00 |
| Correlation_angle90_offset1.to.1layhid4 | -9.19E-01 |
| IDMoment_AllDirection_offset1.to.1layhid4 | -2.22E-01 |
| IDMoment_angle0_offset1.to.1layhid4 | -5.72E-01 |
| IDMoment_angle45_offset1.to.1layhid4 | 3.46E-01 |
| Intercept.to.1layhid5 | 3.44E+00 |
| Correlation_AllDirection_offset1.to.1layhid5 | -4.02E-01 |
| Correlation_angle0_offset1.to.1layhid5 | -6.69E-01 |
| Correlation_angle45_offset1.to.1layhid5 | 1.20E-01 |
| Correlation_angle90_offset1.to.1layhid5 | -1.15E+00 |
| IDMoment_AllDirection_offset1.to.1layhid5 | 5.56E-01 |
| IDMoment_angle0_offset1.to.1layhid5 | 1.05E+00 |
| IDMoment_angle45_offset1.to.1layhid5 | 1.43E+00 |
| Intercept.to.1layhid6 | -3.09E+00 |
| Correlation_AllDirection_offset1.to.1layhid6 | -4.58E-01 |
| Correlation_angle0_offset1.to.1layhid6 | 7.29E-01 |
| Correlation_angle45_offset1.to.1layhid6 | -4.66E-01 |
| Correlation_angle90_offset1.to.1layhid6 | 1.82E+00 |
| IDMoment_AllDirection_offset1.to.1layhid6 | -1.87E+00 |
| IDMoment_angle0_offset1.to.1layhid6 | 2.16E-01 |
| IDMoment_angle45_offset1.to.1layhid6 | -5.19E-01 |
| Intercept.to.2layhid1 | 1.18E+00 |
| 1layhid1.to.2layhid1 | -1.13E-01 |
| 1layhid2.to.2layhid1 | 5.94E+00 |
| 1layhid3.to.2layhid1 | -8.44E-01 |
| 1layhid4.to.2layhid1 | 1.47E+00 |
| 1layhid5.to.2layhid1 | -9.55E-01 |
| 1layhid6.to.2layhid1 | 1.36E+00 |
| Intercept.to.2layhid2 | -1.54E-01 |
| 1layhid1.to.2layhid2 | 1.35E+00 |
| 1layhid2.to.2layhid2 | -1.09E+00 |
| 1layhid3.to.2layhid2 | -1.17E+00 |
| 1layhid4.to.2layhid2 | 1.66E+00 |
| 1layhid5.to.2layhid2 | 6.28E-01 |
| 1layhid6.to.2layhid2 | 4.02E-01 |
| Intercept.to.2layhid3 | 4.33E-01 |
| 1layhid1.to.2layhid3 | -6.69E+00 |
| 1layhid2.to.2layhid3 | 4.22E+00 |
| 1layhid3.to.2layhid3 | -2.29E+00 |
| 1layhid4.to.2layhid3 | 1.13E+00 |
| 1layhid5.to.2layhid3 | 3.84E+00 |
| 1layhid6.to.2layhid3 | -2.81E-01 |
| Intercept.to.2layhid4 | -2.63E-01 |
| 1layhid1.to.2layhid4 | -2.99E+00 |
| 1layhid2.to.2layhid4 | 5.62E-01 |
| 1layhid3.to.2layhid4 | 1.34E+00 |
| 1layhid4.to.2layhid4 | 1.12E+00 |
| 1layhid5.to.2layhid4 | 1.92E+00 |
| 1layhid6.to.2layhid4 | 1.23E+00 |
| Intercept.to.2layhid5 | 3.83E-01 |
| 1layhid1.to.2layhid5 | 1.20E-04 |
| 1layhid2.to.2layhid5 | -4.68E-01 |
| 1layhid3.to.2layhid5 | 5.12E-01 |
| 1layhid4.to.2layhid5 | 7.98E-01 |
| 1layhid5.to.2layhid5 | 8.49E-01 |
| 1layhid6.to.2layhid5 | 4.63E-01 |
| Intercept.to.2layhid6 | 7.79E-01 |
| 1layhid1.to.2layhid6 | 1.79E+00 |
| 1layhid2.to.2layhid6 | 1.09E-01 |
| 1layhid3.to.2layhid6 | 1.60E-01 |
| 1layhid4.to.2layhid6 | -2.62E-01 |
| 1layhid5.to.2layhid6 | -2.89E-01 |
| 1layhid6.to.2layhid6 | 2.48E-01 |
| Intercept.to.1 | -5.81E-01 |
| 2layhid1.to.1 | -1.78E-01 |
| 2layhid2.to.1 | -1.31E+00 |
| 2layhid3.to.1 | -1.22E+00 |
| 2layhid4.to.1 | 2.79E-01 |
| 2layhid5.to.1 | 2.25E+00 |
| 2layhid6.to.1 | 7.79E-01 |
| Intercept.to.2 | -3.37E-01 |
| 2layhid1.to.2 | -4.02E-01 |
| 2layhid2.to.2 | -7.97E-01 |
| 2layhid3.to.2 | 1.37E+00 |
| 2layhid4.to.2 | -6.31E-01 |
| 2layhid5.to.2 | 7.34E-01 |
| 2layhid6.to.2 | 1.23E+00 |

Supplementary Table4. Performance for risk prediction models in training and validation cohorts.

| **Training cohort** | **Sensitivity(95%)** | **Specificity(95%)** | **PPV (95%CI)** | **NPV (95%CI)** | **Kappa** | **Brier** |
| --- | --- | --- | --- | --- | --- | --- |
| RFC | 92.86(90.45-95.27) | 96.67(94.26-99.08) | 83.87(81.46-86.28) | 99.06(97.18-100.94) | 0.617 | 0.056 |
| SVM | 71.43(69.04-73.82) | 95.35(92.96-97.74) | 66.67(64.28-69.06) | 94.24(91.85-96.63) | 0.683 | 0.074 |
| DT | 78.57(76.18-80.96) | 95.35(92.96-97.74) | 68.75(66.36-71.14) | 97.16(94.77-99.55) | 0.667 | 0.066 |
| ANN | 85.71(83.32-88.10) | 95.81(93.42-98.20) | 72.73(70.34-75.12) | 98.10(96.87-99.33) | 0.636 | 0.062 |
| XGboost | 75.00(72.59-77.41) | 95.35(92.94-97.76) | 67.74(65.33-70.15) | 96.70(94.29-99.11) | 0.676 | 0.069 |
| **Validation cohort** |  |  |  |  |  |  |
| RFC | 95.00(92.59-97.41) | 96.47(94.06-98.88) | 86.36(83.95-88.77) | 98.80(97.45-100.15) | 0.620 | 0.054 |
| SVM | 65.00(62.55-67.45) | 89.41(86.96-91.86) | 59.09(56.64-61.54) | 91.57(89.12-94.02) | 0.679 | 0.071 |
| DT | 75.00(72.55-77.45) | 90.59(88.14-93.04) | 65.22(62.77-67.67) | 93.90(91.45-96.35) | 0.661 | 0.065 |
| ANN | 85.00(82.55-87.45) | 94.12(91.67-96.57) | 77.27(74.82-79.72) | 96.39(93.94-98.84) | 0.643 | 0.062 |
| XGboost | 70.00(67.55-72.45) | 89.41(86.96-91.86) | 60.87(58.42-63.32) | 91.57(89.12-94.02) | 0.679 | 0.068 |

Abbreviations: RFC. Random Forest Classifier. SVM. Support Vector Machine. DT. Decision Tree. ANN. Artificial Neutral Network. XGboost. eXtreme Gradient boosting. AUC. Area Under Curve. 95%CI. 95% confidence interval. PPV positive predictive value, NPV negative predictive value, 95% CI 95% confidence interval.


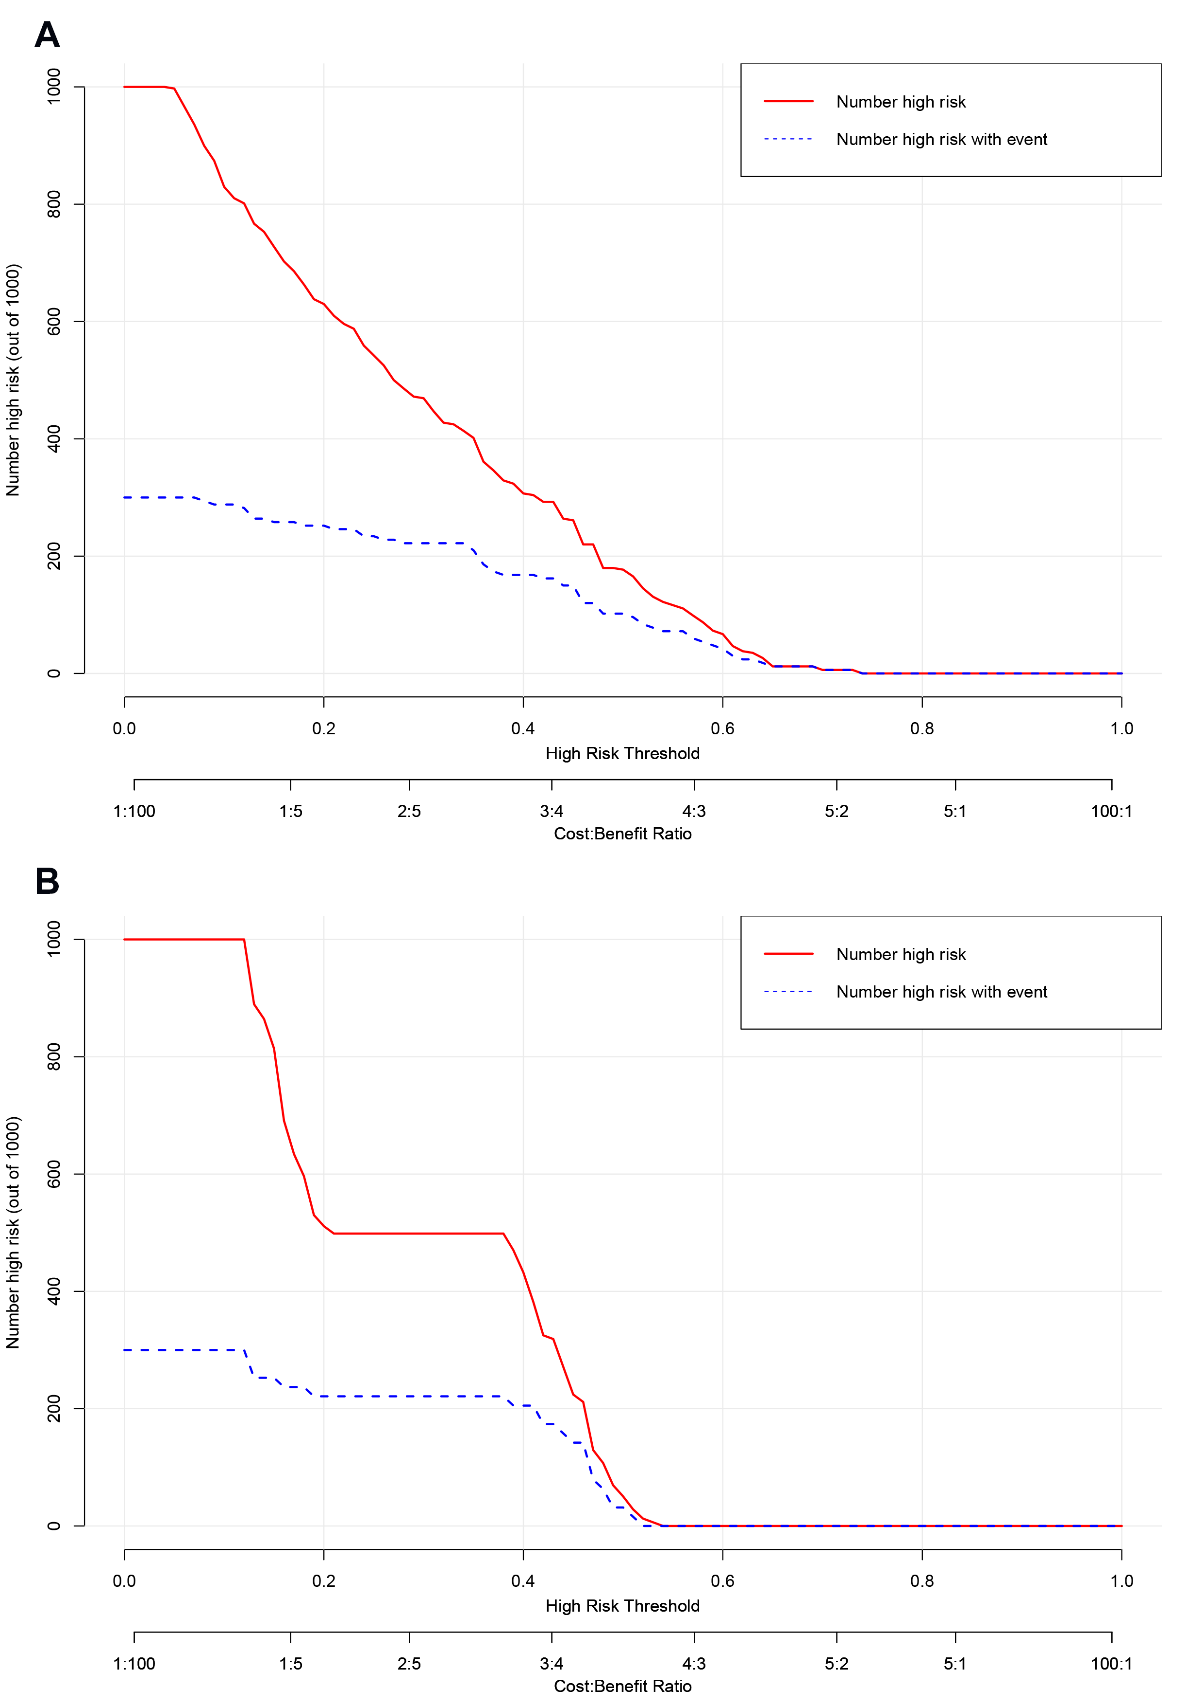


Supplementary Figure1. Prediction performance of RFC model via CIC. A. Training set.B. Validation set.

Notes. The blue curve (number high risk with outcome) indicates the number of true positives under each threshold probability, and the red curve (numberhigh risk) indicates the number of people classified as positive (high risk) by the prediction model under each threshold probability
